# Supplementary material for: Continuous-range tunable multilayer frequency-selective surfaces using origami and inkjet printing
Source: PubMed Central journal article supplement — Proc Natl Acad Sci U S A. 2018 Dec 13;115(52):13210–5. doi: 10.1073/pnas.1812486115 (PMC6310857; doi:10.1073/pnas.1812486115), 2018-12-13
Supplement: pnas.1812486115.sapp.pdf [file pnas.1812486115.sapp.pdf]

1

## 2 **Supplementary Information for**

### 3 **Continuous-range tunable multi-layer frequency selective surfaces using origami and** 4 **inkjet-printing**

5 **Syed Abdullah Nauroze, Larissa S. Novelino, Manos M. Tentzeris and Glaucio H. Paulino**

6 **Glaucio H. Paulino.**

7 **E-mail: paulino@gatech.edu**

#### 8 **This PDF file includes:**

- 9     Supplementary text
- 10    Figs. S1 to S10
- 11    Tables S1 to S2
- 12    Captions for Movies S1 to S3
- 13    References for SI reference citations

#### 14 **Other supplementary materials for this manuscript include the following:**

- 15     Movies S1 to S3

## 16 Supporting Information Text

### 17 1. Miura-Ori Geometry

18 The Miura-Ori is a rigid foldable origami tessellation defined by the geometry of its rhombic-shaped panels, each of which is  
 19 characterized by the two lengths  $a$  and  $b$  and the acute angle  $\alpha$ . This pattern presents one degree of freedom, meaning that we  
 20 describe its kinematics by one of the dihedral angles between panels, defined as the folding angle. Our parametrization for the  
 21 Miura-Ori unit cell follows (1), where  $\theta$  is used as folding angle (Fig. S1):

$$22 \quad w = 2b\xi, \quad \ell = 2a\zeta, \quad v = b(1 - \xi^2)^{1/2}, \quad h = a\zeta \tan(\alpha) \cos(\theta/2) \quad [S1]$$

23 where

$$24 \quad \xi = \sin(\alpha) \sin(\theta/2), \quad \zeta = \cos(\alpha) (1 - \xi^2)^{-1/2} \quad [S2]$$

25 In addition, the dihedral angle  $\varphi$  (Fig. S1), which is the dihedral angle between the folded dipoles, is also expressed as a  
 26 function of  $\theta$ ,

$$27 \quad \varphi = 2 \sin^{-1}(\zeta \sin(\theta/2)) \quad [S3]$$

28 Multiple layers of the Miura-Ori pattern with compatible in-plane kinematics can be stacked. This compatibility is achieved  
 29 if the dimensions  $w$ ,  $\ell$  and  $v$  are the same for all the layers, leaving  $h$  as an independent dimension (2, 3) (Fig. S1). Those  
 30 conditions result in the design constraints on Eq. S4.

$$31 \quad a_t = a_b \frac{\cos(\alpha_b)}{\cos(\alpha_t)}, \quad b_t = b_b \quad [S4]$$

32 where, the subscript  $b$  and  $t$  represent the bottom and top layer a given Miura design parameter. In addition, because the  
 33 stacking preserves the in-plane kinematics, a single dihedral angle can still be used to describe the kinematics of the stacking,  
 34 thus the folding angle  $\theta_t$  of the top layer can be written in terms of the bottom layer

$$35 \quad \sin(\theta_t/2) = \frac{\sin(\alpha_b)}{\sin(\alpha_t)} \sin(\theta_b/2) \quad [S5]$$

36 Multi-layer structures retain the flat-foldability of the Miura-Ori, that is, they can still be fully folded (i.e, folding angles  
 37  $\theta_t = \theta_b = 0$ ). However, structures with distinct layers have the total extension of the largest layer limited by the smallest  
 38 layer. When the smallest layer is fully extended ( $\theta = 180^\circ$ ), all the other layers will be restrained to further expansion and that  
 39 will be the maximum expansion of those. Therefore, a Miura-Ori with layers with distinct geometry cannot be unfolded into a  
 40 flat configuration, but it is still flat-foldable. The maximum folding angle of each layer is defined by

$$41 \quad \theta_t = 2 \sin^{-1} \left( \frac{\sin(\alpha_b)}{\sin(\alpha_t)} \right) \quad [S6]$$

42 The design constraints on Eq. S4 and the relationship between folding angles on Eq. S5 are valid for both types of stacking.  
 43 For inline stacking, we followed the Eq. S4 to design compatible top layers for a bottom layer with fixed intrinsic geometry  
 44  $a_b = 20$  mm,  $b_b = 20$  mm and  $\alpha_b = 45^\circ$ . On Table S1, we report the length  $a_t$  of the panel for each panel angle  $\alpha_t$  studied in  
 45 this work. For the mirror stacking, we used identical layers, therefore the design constraints are automatically satisfied. While  
 46 in theory the mirror stacking and the bottom layer of the inline stacking are able to completely unfold, in practice, for the  
 47 paper prototype, this unfolding is not trivial because of the plasticity of paper at the hinges. However, this plasticity acts in  
 48 our favor because it allows the pattern to keep the angle engaged (i.e. retains the mountain and valley assignment, which is  
 49 fundamental for the pattern actuation. (Fig. S2). It is important to notice that, the use of other materials as substrate and  
 50 other approaches to create hinges are possible, in which the complete unfolding is achievable.

51 The distances between conductor elements,  $D_w$  and  $D_\ell$ , changes with the folding angle  $\theta$  and these can be expressed in  
 52 terms of the parameters  $w$  and  $\ell$  of the unit cell, the length of the conductor line  $l_c$ , and the line position within the unit cell.

$$53 \quad D_w = \beta w, \quad D_\ell = \psi \ell \quad [S7]$$

54 where  $\psi = l_c/2a$  and  $\beta$  is the design parameter that provides the conductor position in the unit cell (Fig. S1). When considering  
 55 multi-layer structures, the extrinsic parameters  $w$  and  $\ell$  on Eq. 9 are expressed in terms of the bottom layer parameters (i.e.,  $a_b$ ,  
 56  $b_b$ ,  $\alpha_b$ ), while  $\beta$  and  $\psi$  refers to the specific layer where the conducts are located. For multi-layer configurations, the interlayer  
 57 distance is defined by an extra extrinsic parameter  $\Delta h$ . For the in-line stacking, this is expressed as

$$58 \quad \Delta h = h_t - h_b \quad [S8]$$

59 and for the mirror stacking

$$60 \quad \Delta h = h_t + h_b \quad [S9]$$

61 where for identical layers,  $\Delta h = 2h_b$ .

## 62 2. Mechanical Analysis

63 To simulate the electromagnetic response of the Miura-FSS structure, we assumed that the Miura-Ori has a rigid origami  
64 behavior. The following mechanical analysis shows that this is a fair assumption for the proposed structure Fig. S3

65 **A. Bar and Hinge Simulation.** We discretized the unit cells according to the bar and hinge model (4). This reduced-order model  
66 represents the vertices by pin-joints and the fold lines by bars with axial stiffness and rotational springs along them. In addition,  
67 to avoid internal mechanisms and to give an approximation to the bending of the panels, the panels are triangulated by similar  
68 bar elements (Fig. S3(A)). The most important parameter for such analysis is the ratio  $k_r$  between the bending stiffness ( $k_{bend}$ )  
69 of the panels and the folding stiffness of the hinges ( $k_{fold}$ ). Therefore, we tested the cellulose paper used to fabricate the  
70 Miura-FSS, and obtained this ratio equal to 3.3 (see subsection 2.B). Using the bar and hinge model and the obtained stiffness  
71 ratio, we simulated the in-plan motion of the Miura-FSS using the Merlin software (5–7), a MATLAB implementation that  
72 simulates the mechanical behavior of origami structures using a non-linear formulation.

73 To simulate the same folding motion necessary for the reconfigurability of the proposed Miura-FSS, we applied the boundary  
74 conditions shown in Fig. S3(B) and imposed the displacement of the boundary nodes on the right. The total imposed  
75 displacement was computed such that it was equivalent to the change in folding angle from  $\theta = 120^\circ$  to  $\theta = 60^\circ$  (i.e.,  
76 displacement of -62.12 in the  $x$ -direction). The final configuration, equivalent to  $\theta = 60^\circ$  is shown in Fig. S3C, where the  
77 brown lines represent the initial configuration. Figure S3(D-E) shows the final configuration obtained from the simulation for  
78 single-layer, mirror and inline stacking, where the red lines represent the position of the crease lines under a rigid origami  
79 assumption, (i.e. calculated following the parametrization in Eq. S1). We observed that the unit cells that are in the boundary  
80 clearly do not behave as rigid origami, but the unit cells in the middle present a behavior close to a rigid fold origami. Thus,  
81 in Fig. S3 (G-I), we quantitatively compare the values for the parameters calculated from Eq. S1 and Eq. S3 (red column)  
82 with the parameters measured for each unit cell. The green and blue columns represent the minimum and maximum values  
83 obtained from the Merlin simulation, respectively. The percentages indicate the difference between the values obtained from  
84 the simulation and the values from Eqs. S1 and S3.

85 Fig. S3 (J-L) shows the stored energy, where the red line is the total stored energy. The shaded areas in red, blue and  
86 magenta represent the portion of energy of the hinge folding, panels bending and stretching of the crease lines, respectively. We  
87 observe that for the single-layer a small portion of the energy correspond to bending and stretching, while for the multi-layer  
88 structures those are negligible.

89 **B. Mechanical Properties of the Paper.** To obtain the stiffness of the paper at the panels and at the hinges, we emulate the  
90 bending of a single panel and the folding of a single hinge made of cellulose paper of thickness 0.11 mm. For the measurement  
91 of the bending stiffness, we tested a single panel with dimensions 40x20 mm, surrounded by folded tabs. Those tabs simulate  
92 the existence of the surrounding panels. We attached one side of the panel to the support, and applied a total displacement 5  
93 mm along the  $z$ -direction (see Fig. S4A). To apply this displacement, we use an arm located 20 mm (in the  $y$ -direction) from  
94 the support. This arm is attached to a load cell, that measures the reaction force ( $F$ ).

95 For the measurement of the folding stiffness, we tested five samples with two 20x20 mm panels. Those Panels are also  
96 surrounded by folded tabs and are connected by a single hinge that was fabricated with the same dashed perforation as the  
97 Miura-FSS samples. The hinge was completely folded before the test and unfolded to the configuration shown in Fig. S4,  
98 where  $d_{x0} = 5$  mm. For the testing, similarly to the panels test, we attached the sample to the support and applied a total  
99 displacement (in the  $x$ -direction) of 10 mm uniform along the  $z$ -direction using an arm located 20 mm from the support.

100 For each increment of applied displacement ( $\Delta d_x$ ) and measured force ( $F$ ), we calculate the moment  $M$  at the bending/folding  
101 regions and the rotation angle  $\rho$  as

$$102 \quad M = d_x F, \quad \rho = \tan^{-1} \left( \frac{d_{x0}}{d_y} \right) - \tan^{-1} \left( \frac{d_{x0} - \Delta d_x}{d_y} \right) \quad [S10]$$

103 and we plotted the moment-rotation curve shown in Fig. 10. From the slope of the fitted curve, we obtained the stiffness of  
104 each sample. In Table S2 we show the stiffness per unit length for each sample. We average the stiffness values and obtained  
105 the stiffness ratio  $k_r = 3.3$ .

## 106 3. Experimental Setup

107 The measurement setup used to verify the simulation results consisted of a customized Miura-FSS sample holder with an  
108 integrated 3D-printed frame, which was placed in the middle of two constant gain horn antennas as shown in Fig. S5. The  
109 antennas were placed in line-of-sight of each other to realize maximum power transfer between them and were connected to a  
110 vector network analyzer (VNA) using coaxial cables. The distance between the two antennas was kept far enough such that the  
111 Miura-FSS sample was in far-field of each antenna, this is a key criterion for an FSS measurement to ensure that it is excited  
112 by a plane wave.

113 It is also important to note here that the fabricated Miura-FSS structure comprised of finite number of unit cells (hence  
114 finite FSS size) as opposed to the simulation setup, in which infinite array was assumed. Therefore, the fabricated Miura-FSS  
115 was made large enough such that it encloses the main beam of the antenna thereby mitigating the edge effects introduced by a  
116 finite FSS and realizing constant current distribution along resonant elements in the same fashion as in an infinite FSS (8).

One of the key challenges for the measurements of a Miura-FSS is to ensure that each Miura unit cell features the same folding angle. This was realized by using a 3D-printed frame for each folding angle (i.e.  $\theta = 60^\circ, 90^\circ, 120^\circ$ ) as shown in Fig. S5. Moreover, the 3D-printed frame along with the Miura-FSS sample was secured firmly to the rotating table so that the Miura-FSS sample was parallel to the antenna aperture for normal incidence and excited by plane waves. Finally, measurements for different angles of incidence (AoI) were made by rotating the FSS structure around y-axis as shown in Fig. S5.

In this work, a two-step calibration was performed to incorporate system errors and shift the reference plane to the surface of the Miura-FSS structure. First, the effects of the VNA and coaxial cables were eliminated by using a conventional 2-port Short-Open-Load-Through (SOLT) calibration technique at the end of the coaxial cables that would be connected to the antennas. Next, a free-space Gate-Reflect-Line (GRL) calibration was performed to de-embed the region between the antennas and Miura-FSS structure. This was done by first finding the location of the Miura-FSS in time domain by comparing the return loss (as a function of time) of an empty sample holder with a metal sheet using the VNA. Then a proper time-domain gated function (according to the width of the reflected pulse) was applied to filter out any unwanted reflections. Therefore, making sure that the Miura-FSS structure was only excited by direct line-of-sight plane waves. Finally, the calibration was completed by taking reflect and line measurements by respectively placing and replacing a metal sheet with given thickness on sample holder. The quality of calibration was further improved by placing absorbers around the measurement setup to mitigate the effect of unwanted reflections from objects in its surroundings as shown in Fig. S5.

#### 4. Finite element analysis

The Miura-FSS structures were designed and simulated using Ansys HFSS - a finite element method based software. In our simulations, we exploited the periodic nature of the Miura-FSS structure; hence we simulated a unit cell with a master/slave boundary conditions with Floquet port excitation (shown in Fig. S6A) to emulate an infinite structure, thereby saving computational time and resources. This configuration utilizes Floquet's theorem to calculate infinite periodic structures by enforcing the electric field at the master boundary to be same as the slave boundary with a phase delay. Thus, we can use the solution for a unit cell to calculate electromagnetic behavior of the whole structure by multiplying it with appropriate phase difference.

For the single-layer and mirror-stacked structures, unit cells with  $a = b = 20$  mm and  $\alpha = 45^\circ, 56^\circ, 60^\circ, 64^\circ, 70^\circ$  were modeled and simulated. For inline-stacked structures, the bottom unit cell has  $a_b = b_b = 20$  mm and  $\alpha = 45^\circ$ , and the top unit cell has  $b_t = 20$  mm and  $\alpha_t$  and  $a_t$  as shown on Table S1. All the material parameters, as well as the geometric parameters are consistent with the ones utilized in the tested prototypes. For all the simulated Miura-FSS unit cells, the conductor lines were modeled with length  $l_c = 20$  mm, width 2 mm, thickness  $50 \mu\text{m}$ . In addition, the line position within the Miura-Ori unit cell was defined for  $\beta = 0.5$  and  $\gamma = 0.5$  (Fig. S1). In the model, the conductors substrate was also included, which is a cellulose paper with thickness  $110 \mu\text{m}$  and relative permittivity  $\epsilon_r = 3.4$ .

The simulated domain (shown in Fig. S6(A)) was discretized using tetrahedron elements with first order tangential element basis functions, which have 20 degree of freedom (2 unknowns per edge and 2 unknowns per face) per tetrahedron and consider that the electric field varies linearly along the edges. The tangential components of the E-field are stored at the edges and faces of the tetrahedral elements (shown in Fig. S6(B)), and the field inside each tetrahedron is interpolated from these values such that it satisfies the following wave equation.

$$\nabla \times \left( \frac{1}{\mu_r} \nabla \times \mathbf{E}(x, y, z) \right) - k_0^2 \epsilon_r \mathbf{E}(x, y, z) = 0 \quad [\text{S11}]$$

where,

- $\mathbf{E}(x,y,z)$  is the electric field in terms of the basis functions
- $\mu_r$  and  $\epsilon_r$  are relative permeability and permittivity of the material, respectively
- $k_0$  and  $\omega$  are phase constant of free space and angular frequency, respectively.

The tetrahedrons have their initial size determined by the relative permittivity of the material and the operating frequency. That is, each edge of the tetrahedron is set to the effective wavelength of the wave in the given material ( $= \frac{1}{3f\sqrt{\epsilon_r}}$ ). The mesh is interactively refined by the software until convergence is achieved, which occurs when the computed E-field achieves a maximum difference of 0.02dB of scattering parameters between two consecutive iterations.

#### 5. Equivalent-circuit model

Typically, the response of a single-layer or multi-layer FSS is evaluated using 3-D full wave simulators like HFSS and CST. However, they require higher computational power and give limited insight into the working of the structure. Therefore, equivalent-circuit models have been developed that approximate the electromagnetic behavior of the FSS structure as a network of lumped components.

In order to derive the equivalent circuit of an arbitrarily shaped FSS, we first start with the impedance of the FSS that can be represented as (9):

$$Z_{FSS} = -j \frac{\sum_{\substack{p=-\infty \\ p \neq 0}}^{+\infty} \sum_{\substack{q=-\infty \\ q \neq 0}}^{+\infty} \tilde{J}^*(p, q) \tilde{\tilde{G}}(p, q) \tilde{J}(p, q)}{2\tilde{J}^*(0, 0) \tilde{\tilde{G}}(0, 0) \tilde{J}(0, 0)} \quad [S12]$$

where asterisk denotes the complex conjugate and tilde presents the Fourier transform,  $\tilde{\tilde{G}}$  is the dyadic Green's function in free space with infinite periodic boundary conditions,  $(p, q)$  are the Floquet modes and  $J$  is the current flowing through the resonant element. It can be seen that  $Z_{FSS}$  satisfies the Foster theorem (10, 11) thereby featuring the same pole-zero behavior as an LC network.

The FSS reactance values using Eq. S12 assumes that the current density for the FSS element are known a priori. However, a simpler approach involves using a full-wave simulation to determine the reflection coefficient of the FSS structure, then use eq. S13 to determine the impedance of the freestanding FSS.

$$Z_{FSS} = -\frac{Z_0^2(1 + \Gamma)}{2Z_0\Gamma} \quad [S13]$$

where  $\Gamma$  and  $Z_0$  represents the reflection coefficient and the characteristic impedance of free-space (vacuum), respectively. According to Eq. S13, the impedance of a freestanding FSS structure is purely imaginary. The dielectric losses can be incorporated by adding a series resistance in the equivalent circuit. However, these losses can be ignored if the dielectric thickness is very small as compared to the resonant frequency (12).

The structure and the number of the lumped components for an equivalent-circuit model depends on the shape of the resonant elements and their inter-elements distances. For example, a conventional 2D planar dipole-based FSS exhibits band-stop properties with a very narrow bandwidth that can be represented by a series LC network connected across the transmission line where the values of inductance (L) and capacitance (C) are determined by the length of the dipole and the inter-element distance, respectively. Typically, the inter-element distance is kept low (i.e.  $< 0.5\lambda$ ) to avoid grating lobes (12).

The values of the lumped components are determined by first calculating the  $Z_{FSS}$  of the equivalent circuit model (Fig. S8) and setting it equal to zero:

$$Z_{FSS} = jL\omega + \frac{1}{jC\omega} = 0 \quad [S14]$$

$$\omega_r = \frac{1}{\sqrt{LC}}$$

where,  $\omega_r$  is the central design (resonant) frequency. Next, we use the full-wave simulator to determine the null in  $Z_{FSS}$  ( $\omega_r$ ) and set  $C = 1/(L\omega_r^2)$ . This would ensure that the equivalent-circuit model has the same resonant frequency as the full-wave simulation and only differs in bandwidth. As a result, initial value of  $L$  is not important and the bandwidth is optimized by iteratively varying the value of  $L$  such that the overall equivalent-circuit response has the minimum Euclidean distance from the full-wave simulation. For this purpose, two frequency points on the lower and higher edges of the -10dB bandwidth were sufficient for good agreement of equivalent-circuit model and simulation results.

Similarly, the model can be extended to multi-layer structures where each additional layer is equivalent of adding similar LC networks in parallel (with a series transmission line indicating the gap between the layers) to the network shown in Fig. S8(A), which results in higher-order filters that means wider filtering frequency bandwidth. As an example, the equivalent circuit of a three-layer FSS is shown in Fig. S8(B) where  $d_1$  and  $d_2$  represent an equivalent transmission (delay) line whose value depends on the inter-layer distance ( $\Delta h$ ) between the three layers. the electromagnetic response of each layer can be represented by an equivalent LC network.

## 6. Dipole position

**A. Dipoles along the V-shaped creases.** The unique feature of printing dipoles on the mountain creases is that in this configuration, the electrical length and the inter-element distances between the dipoles (along y-axis) varies linearly. This results in a very systematic, predictable and quantifiable frequency response. On the other hand, Miura geometry does not allow comparable linear shrinkage in the y-axis that would result in wider inter-element distances as the Miura geometry is folded. Therefore, the dipoles printed on the V-shaped creases may have a reduced electrical length but inter-element distances would become larger than the  $\lambda$  (wavelength of the operational frequency) with folding. This means that the real and imaginary part of the dipole impedance will change for different values of angle of incidence (as compared to only real part variation in the mountain fold dipoles presented in the paper) resulting in an unstable angle of incidence rejection.

Second, the shape of the dipole on the V-shaped creases is also critical. Let's consider the two sub cases below

**A.1. Straight dipoles.** In this case, the dipoles are printed along the V-mountain folds of the Miura geometry that are parallel to the x-axis as shown in Fig. S9(A). In the folded configuration, the dipole on the mountain fold folds upwards while the one on the valley fold, folds inwards that would mean that they would experience different phases from the incoming field. The phase variation would become even more pronounced at lower values of the folding angle  $\theta$  where dipoles would have reduced electrical length (higher resonant frequency) and wider inter-element distances. Thereby further complicating quantification of the electromagnetic behavior of the FSS structure. The non-linearity of such FSS can be seen in Fig. S9(C), where the

218 resonance frequency at  $\theta = 60^\circ$  is lower than the one at  $\theta = 90^\circ$  even though the electrical length of the dipole is shorter  
 219 for the former case. Moreover, the change in resonance frequency with folding angle is also not linear. Last, the bandwidth  
 220 also decreases with folding which is primarily due to the wider inter-element distances (12). As mentioned earlier, the wider  
 221 inter-element distances give rise to an unstable angle of incidence rejection as shown in Fig. S9(E,G) for  $\theta = 180^\circ$  and  $120^\circ$ ,  
 222 respectively.

223 **A.2. V-shaped dipoles.** In order to minimize the phase difference of the two dipoles at the two folds, a V-shaped dipole can be  
 224 used as shown in Fig. S9(B). This can introduce linear variation in the frequency response of the Miura-FSS with folding angle  
 225 as shown in Fig. S9(D). However, inter-element distance (along y-axis) is still much larger for the given dipole length used in  
 226 the paper and it becomes even larger (compared to resonant frequency wavelength) as the structure is folded. This results in  
 227 unstable frequency response with angle of incidence (12) as shown in Fig. S9(F,H).

228 As a conclusion, one of the limitations of Miura structure is that it does not realize linear shrinkage in both axes. This  
 229 can be realized by using more complex origami structures such as egg-box. However, egg-box cannot be transitioned into flat  
 230 configuration that makes printing complicated. Therefore, analysis of a dipole-FSS (with dipole placed on the mountain fold)  
 231 frequency response gives an in-detail and accurate basis to design any tunable FSS using a given origami structure.

232 **B. One dipole on V-shaped crease and one parallel to y-axis.** In view of the detailed explanation on the effects of inter-element  
 233 distance on the FSS frequency response, we can conclude that if we place one dipole on V-shaped crease and one parallel to  
 234 y-axis neither of them would have required inter-element distance and thus would also have narrow-band and unstable angle of  
 235 incidence frequency response.

## 236 7. Specimens sensitivity

237 Variation in frequency response due to change in folding angle is the key to realize continuous-range frequency tunability for  
 238 the proposed structure. Therefore, a quantitative measure of tolerance due to variation of folding angle across the sample is  
 239 important. Typically, the complete frequency response of FSS structures is defined by both its resonance frequency and the  
 240 bandwidth. For our structures (band-stop filters), maximum reflection occurs at the resonance frequency while the bandwidth  
 241 is defined at the two points where the transmission curve intersects the -10dB level. That is the structure reflect at least 90%  
 242 of the incident power at all frequencies points within the bandwidth of the filter. Thus, a slight shift in resonant frequency can  
 243 be compensated as long as the desired resonant frequency is within its bandwidth. For example, lets consider the frequency  
 244 response of a typical single-layer bandstop filter with resonance frequency  $f_c$  as shown in Fig. S10(A) with the respective  
 245 bandwidth highlighted in grey. Now if the resonant frequency shifts at  $f_2$  we can still get good reflection as  $f_c$  lies within the  
 246 (shifted) bandwidth. However, this would not be the case if the resonant frequency shifts to  $f_1$  as value of  $S_{21}$  for  $f_c$  is more  
 247 than -10dB. Therefore, the system can compensate for the shift in resonant frequency as long as its magnitude is less than  
 248 -10dB. That is why very narrow band FSS are generally undesirable because it would not only require a system with very high  
 249 frequency resolution (thereby increasing its cost) but would also be prone to failure with slight variation in the structure.

250 In order to quantify the tolerances for the proposed structure with respect to variation in folding angle long the Miura-FSS  
 251 structure, we fabricated a graded Miura-Ori (13) with dipole elements. The grading allows for a Miura-FSS with different  
 252 folding angles across the unit cell. We use the intrinsic parameter  $c$  (see Fig. S10(B)) to define the grading as follows

$$253 \quad c_i = (1 + (i - 1)P)c_1, \quad i = 1..N \quad [S15]$$

254 where  $i$  refers to the numbering of the unit cells in the  $x$ -direction,  $N$  is the total number of unit cells in the  $x$ -direction and  $P$   
 255 is the percentage of increasing. We prototype and tested models with  $P = 0.02$  and  $P = 0.1$  (i.e., 2% and 10% graded). We  
 256 design the structure such that all the unit cells have different extension  $w_i$  in the  $x$ -direction and the same dimension  $\ell$ ,  $v$ , and  
 257  $h$  (see Figure S1). This results in the following design constraints

$$258 \quad \alpha_i = \cos^{-1} \left( \frac{b_1}{b_i} \cos(\alpha_1) \right), \quad i = 1..N \quad [S16]$$

259 where  $\alpha_1 = 45^\circ$ ,  $a = 20$  mm,  $b_1 = 20$  mm, and  $b_i = (c_1^2 + c_i^2 - b_1^2)^{1/2}$ .

260 The folding angle of all the unit cells is defined as a function of the folding angle  $\theta_1$  of the smallest unit cell (i.e., unit cell  
 261 number 1)

$$262 \quad \theta_i = \sin^{-1} \left( \sin(\rho) \frac{\sin(\alpha_1)}{\sin(\alpha_i)} \right), \quad i = 1..5 \quad [S17]$$

263 where

$$264 \quad \rho = \cos^{-1} \left( \frac{\sin(\theta_i/2) \cos(\alpha_1)}{(1 - (\sin(\alpha_1) \sin^2(\theta_1/2))^{1/2})} \right) \quad [S18]$$

265 The simulated and measured results of 0% (uniform Miura-FSS), 2% and 10% graded Miura-FSS are shown in Fig. S10(D)  
 266 with folding angle  $\theta_1 = 90^\circ$ . It can be seen that the resonant frequency for uniform (0% graded) Miura-FSS can be filtered  
 267 even if folding angle of each neighboring cell varies up to 10%.

## 268 8. Applications of shape-reconfigurable Miura-FSS

269 Shape-reconfigurable Miura-FSSs are good candidates for terrestrial, outer-space and electromagnetic cloaking applications  
270 over tunable frequency ranges, as well as morphing devices. Reconfigurable FSS allows a designer to use the same structure  
271 for different operational frequencies. This also helps re-tune the frequency response of the structure effectively compensating  
272 for manufacturing or installation errors or failure of some radiating elements due to environmental factors. One of the most  
273 common methods to achieve reconfigurability is to use electronic components such as diodes and varactors that become  
274 expensive and complicated for increasing sizes of the FSS structure. Since these are non-linear devices, they make the overall  
275 response of the structure non-linear as well. Therefore, Miura-FSS presents a more robust mechanism to change, on-the-fly, the  
276 electromagnetic response of FSS structures without using any non-linear electronic components.

277 In addition to the electromagnetic reconfigurability of Miura-FSS structures, their ability to be stowed in small spaces and  
278 on-demand deployability makes them extremely important for terrestrial and outer-space applications. For example, one of the  
279 key components of the space-to-ground communication systems is the parabolic reflector that ensures high signal fidelity due to  
280 its large gain. However, its typically large size and high manufacturing cost makes it a very expensive payload especially for  
281 modern cubesats. That is why modern satellites use reflectarrays due to their planar design and ability to reflect the desired  
282 band of frequencies in a given direction. The operation principle of reflectarrays is similar to FSS except that the size of each  
283 neighboring element of a reflectarray is varied such that there is a progressive phase difference between them as opposed to  
284 FSS where the phase difference is constant between each neighboring element (14). The amount of phase difference dictates the  
285 beam scanning ability of the reflectarrays. One of the key drawbacks of these structures is their inability to reconfigure the size  
286 of each element on-the-fly thereby limiting its beam scanning ability. On the contrary, the proposed Miura-FSS would enable us  
287 to change the size of these radiating elements on-demand by simply changing its folding angle. This would allow us to realize a  
288 deployable reflectarray with wider beam scanning ability and lower failure rate as compared to traditional reflectarrays.

289 Similarly, FSS structures are also used for electromagnetic cloaking of metallic structures. A common figure of merit to  
290 detect the electromagnetic size of RF structures (such as antennas) for a given band of frequencies, is its radar cross-section  
291 (RCS). Typically, RCS of an antenna is reduced by either placing FSSs at the aperture (of horn antenna) or using them as a  
292 ground plane (for planar antennas e.g. patch antenna) (15). The frequency band can be varied by using tunable FSS structures.  
293 However, traditional flat FSSs are harder to mount, complicated to reconfigure and additional biasing network for electronic  
294 reconfigurable FSS structures may not be desirable for some applications (16). Since Miura-Ori geometry provides higher  
295 mechanical strength as well as wider frequency tunability range as compared to flat FSS, the presented Miura-FSS structures  
296 would be a better alternative in a sandwich configuration (17). Moreover, multi-layer configuration is typically required for  
297 wide-band RCS reduction applications, which is much easier to realize using the approach presented in this work than the  
298 traditional multi-layer FSSs.

299 Another key application could be the design of a universal “morphing” radome that can be optimized for various operational  
300 frequencies without modifying its design. Typical radomes feature a curved or a flat configuration. While the curved radomes  
301 are extremely costly to fabricate and harder to mount, the flat radomes (comprising of FSS structures) do not offer high  
302 reconfigurability and suffer from non-linear effects mentioned earlier. On the other hand, curved Miura structures can be  
303 easily realized by varying the shape of the unit cell. This makes mass-production of radomes possible and with their ability to  
304 be stowed in small spaces, they can be transported much easily as compared to the traditional radomes. Similarly, due to  
305 their higher mechanical strength and wider frequency tunability, they can be used as the filling material in the dry walls for  
306 shielding or structural health monitoring purposes (18) that could find applicability in a variety of scenarios e.g. hospitals,  
307 radiation rooms, homes (to create localized wifi zones). From the aforementioned, there is a broad range of applications of  
308 shape-reconfigurable Miura-FSS.

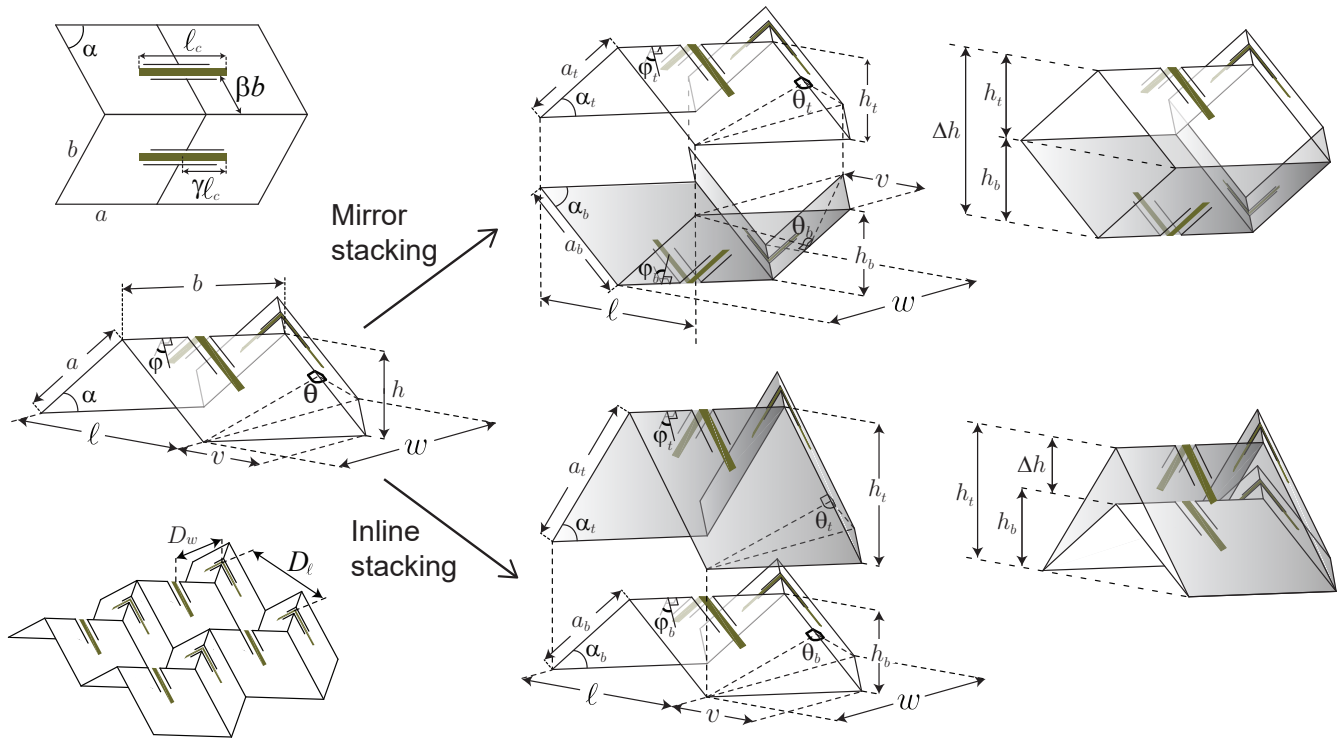

Fig. S1. Schematics of the single- and multi-layer Miura-FSS unit cells.



**A**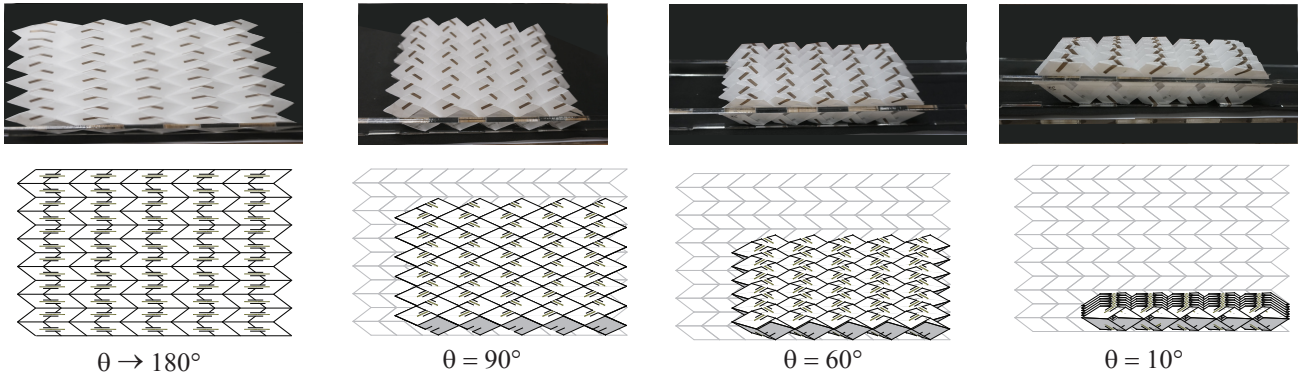**B**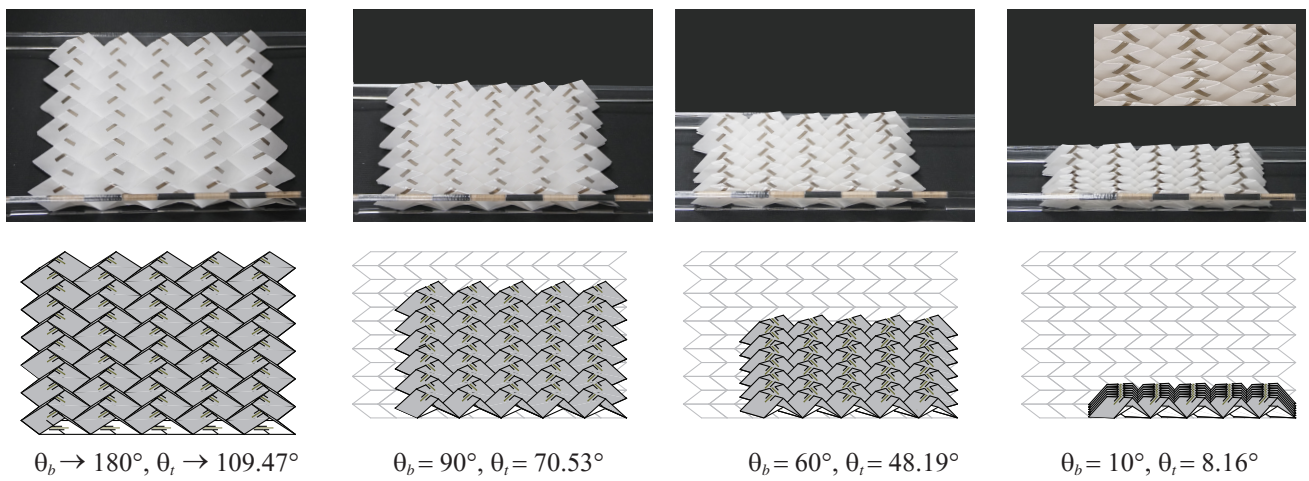**C**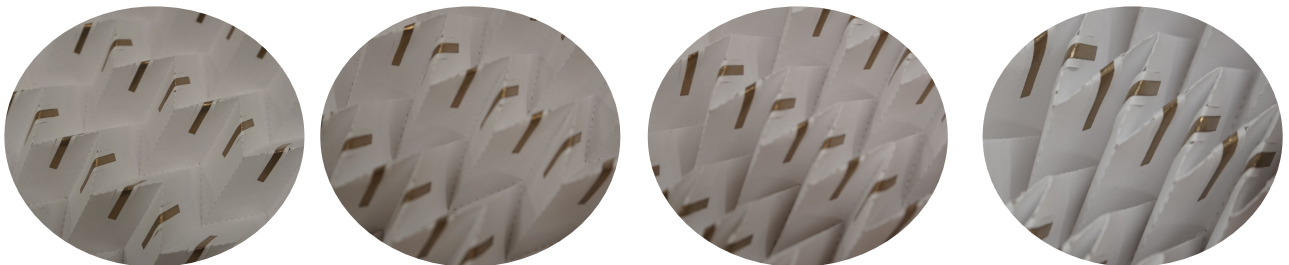

**Fig. S2.** Illustration of the kinematics of the (A) mirror and (B) inline stacking, and (c) Bridge-like structures in different folding stages.

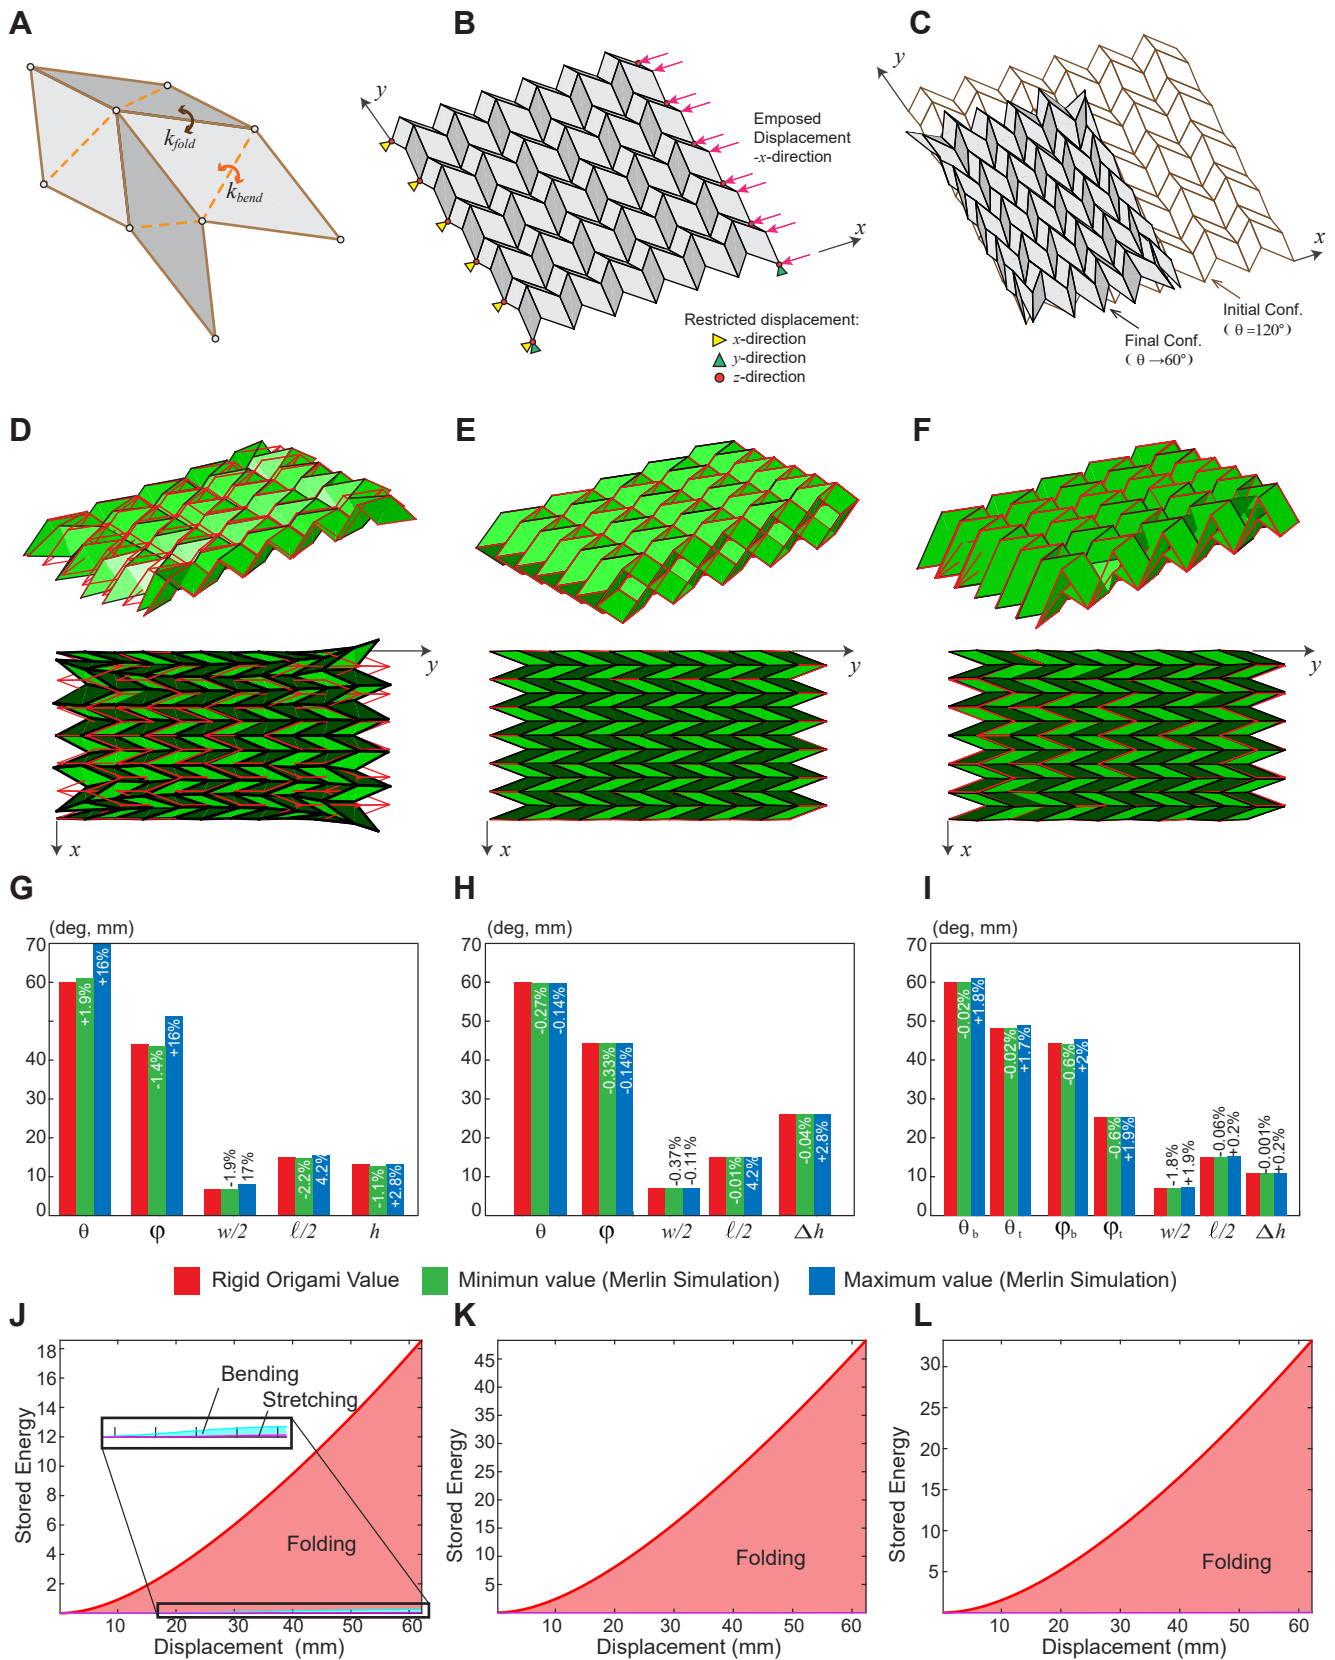

**Fig. S3.** Mechanical simulation of the Miura-Ori pattern. (A) Discretization of the unit cell using the bar and hinge model. (B) Applied Boundary conditions and (C) final configuration after applied displacement from  $\theta = 120^\circ$  to  $\theta = 60^\circ$ . Final configuration of the (D) single layer and (E) mirror-stacking with  $a = b = 20$  mm and  $\alpha = 45^\circ$ , and (F) inline-stacking with  $a_b = b_b = 20$  mm,  $\alpha_b = 45^\circ$  and  $\alpha_t = 60^\circ$ , where the red lines represents the configuration assuming a rigid origami behavior. (G-I) Unit cell parameters comparison with the rigid origami assumption and the maximum and minimum parameters values obtained from the Merlin simulation (J-K) Plot of the stored energy.

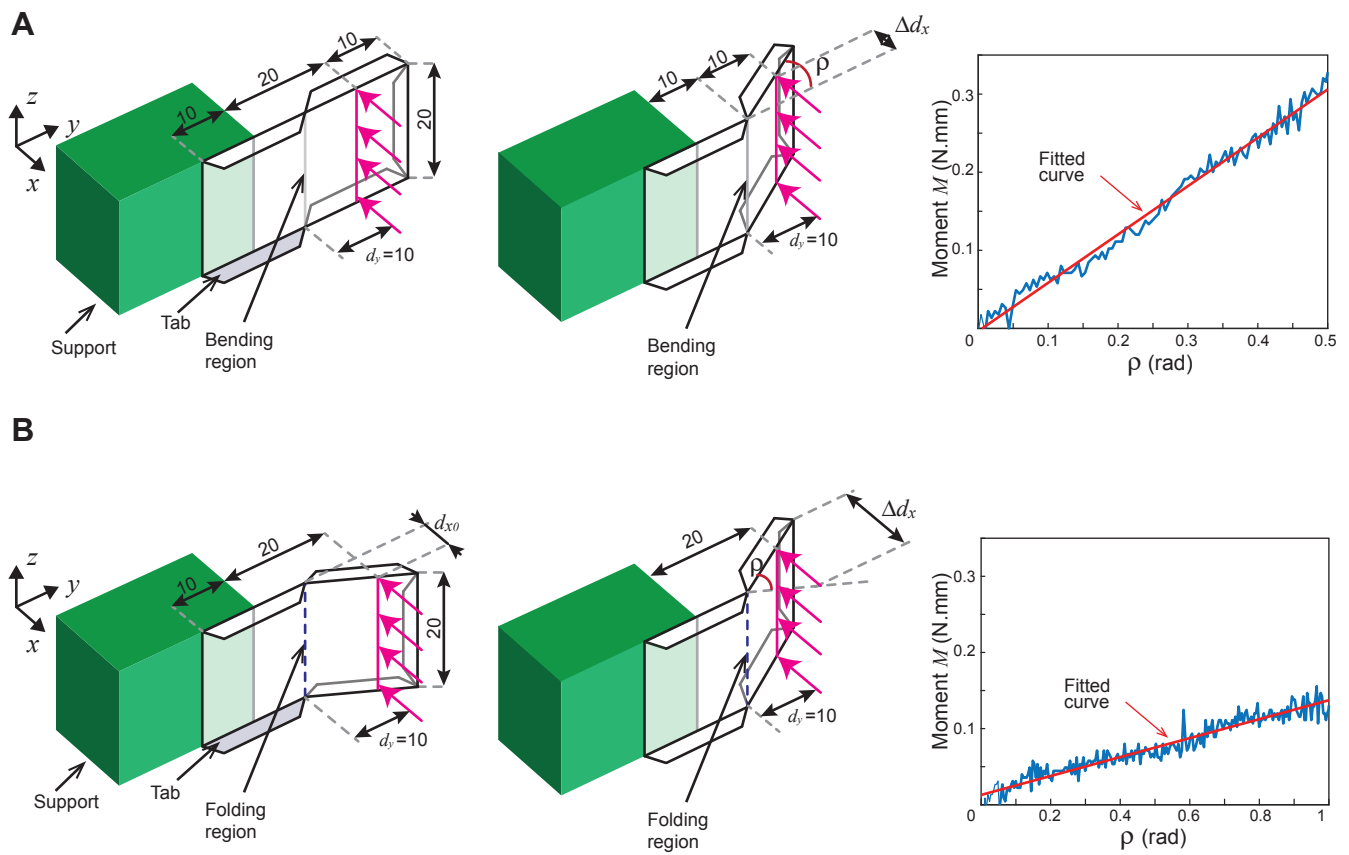

**Fig. S4.** Illustration of the test setup for stiffness characterization of (A) panel bending and (B) hinge folding, and respective Moment-rotation curve for one sample. The magenta arrows and line represent the region where the displacement is applied.

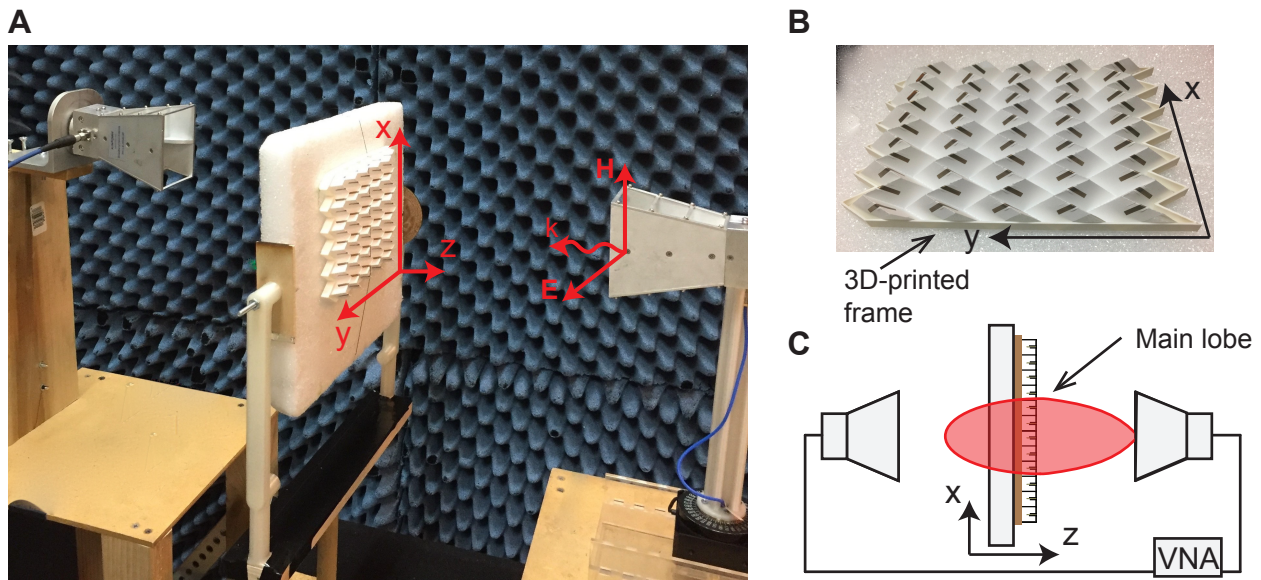

**Fig. S5.** Experimental setup and prototyped Miura-FSS. (A) Experiment setup, where  $k$ ,  $E$ , and  $H$  are the direction of propagation, the Electric field, and the magnetic field, respectively, of the electromagnetic wave (B) Prototype with the 3d-printed frame (C) Schematics of the position of the prototype relative to the main lobe of the source

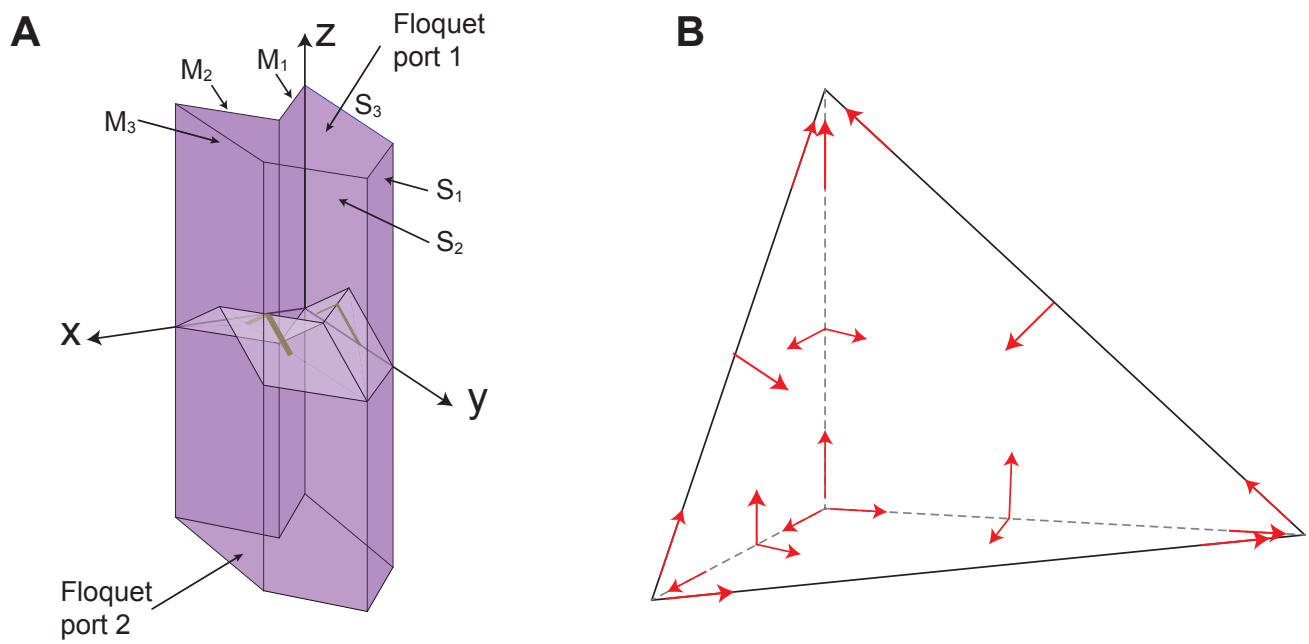

**Fig. S6.** (A) Numerical model with Floquet port excitation and master-slave boundary condition, where  $M_i$  stands for master and  $S_i$  for slave and the subscript  $i = 1, 2, 3$  identify the master-slave pairs. (B) Tetrahedral element used in the domain discretization

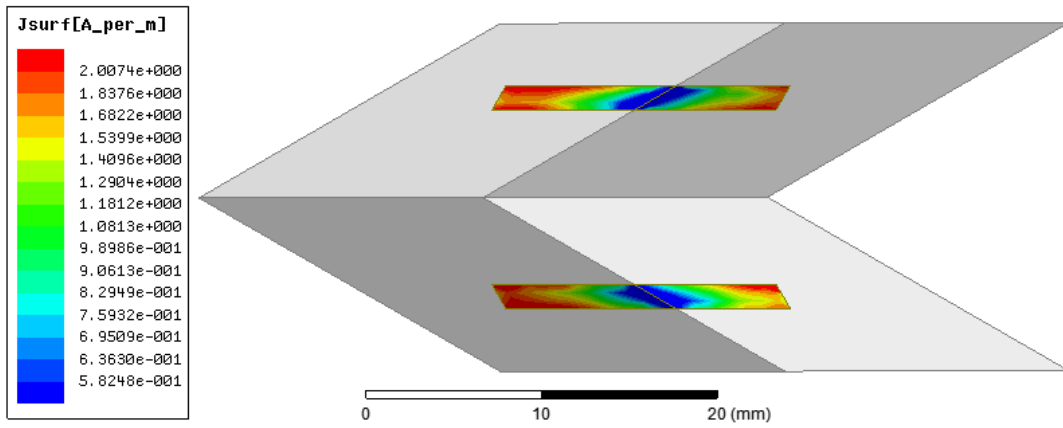

**Fig. S7.** Surface current density the single-layer Miura-FSS with  $\alpha = 45^\circ$  and  $\theta = 90^\circ$

**A**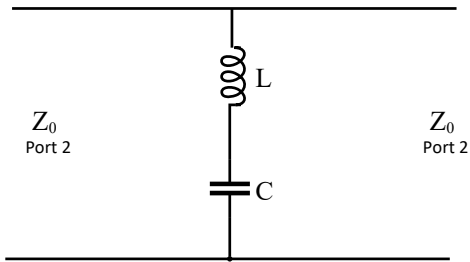**B**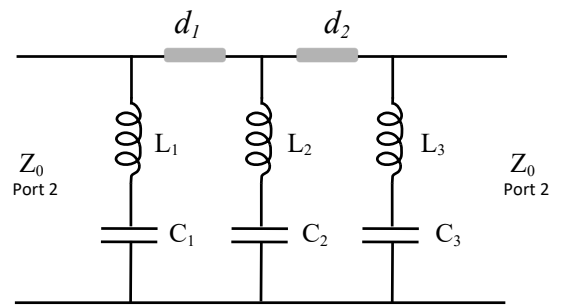

**Fig. S8.** (A) Equivalent circuit model of single-layer dipole FSS. (B) Equivalent circuit of three layered Miura-FSS with inter-element distances  $d_1$  and  $d_2$ .

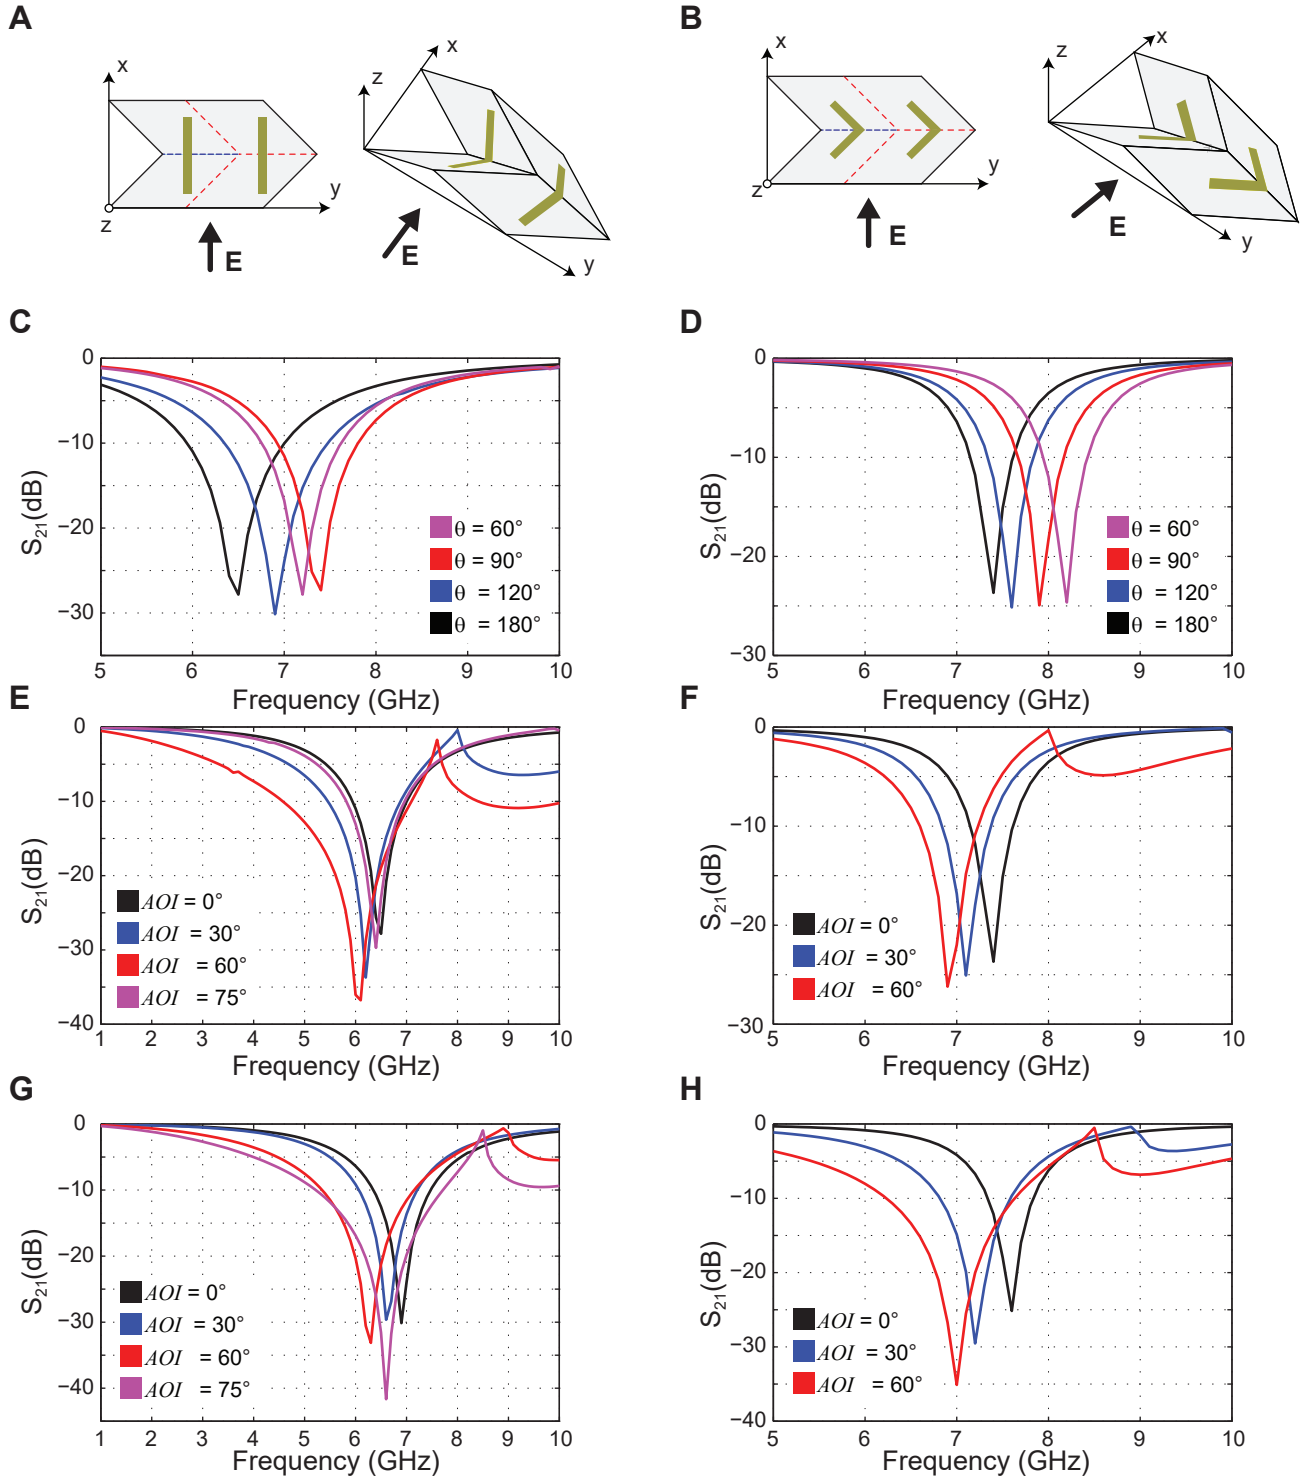

**Fig. S9.** Unit cell of single-layer Miura-FSS with (A) straight and (B) V-shaped dipoles placed along the V-crease mountain fold in unfolded and folded configuration ( $\alpha = 45^\circ$ ,  $a = b = 20$  mm). Simulated  $S_{21}$  frequency response for single-layer Miura-FSS with (C) straight and (D) V-shaped dipoles for different values of folding angle  $\theta$ . Simulated  $S_{21}$  frequency response for Miura-FSS with (E,G) straight and (F,H) V-shaped dipoles for different values of angle of incidence (AoI) at flat configuration  $\theta = 180^\circ$  and folded configuration  $\theta = 120^\circ$ , respectively.



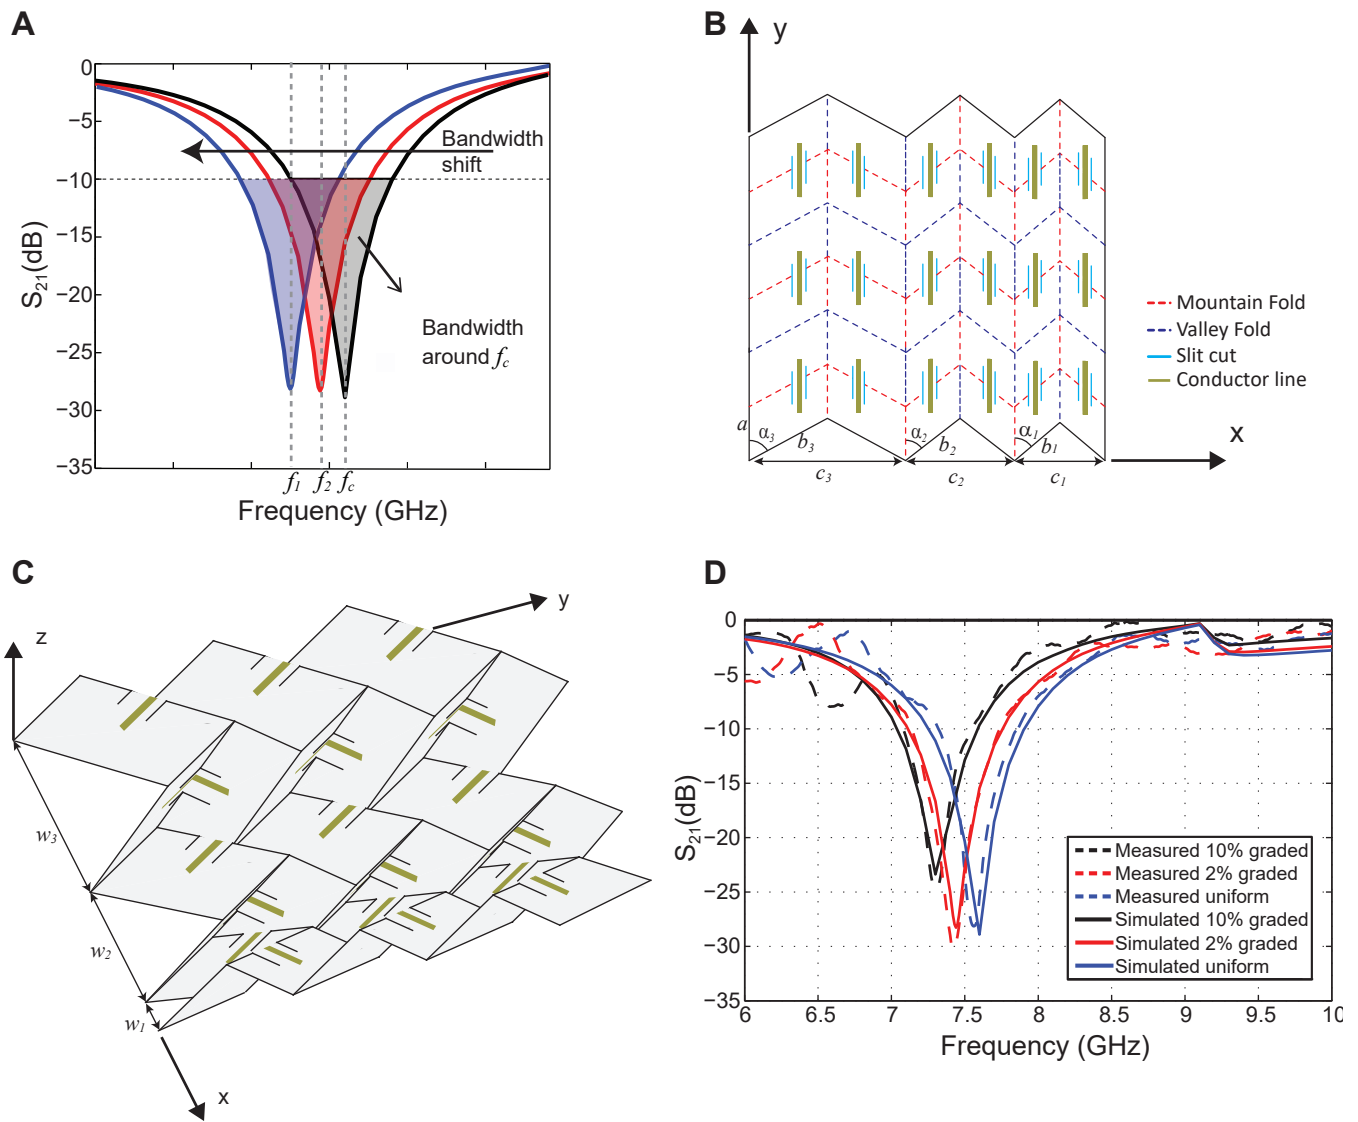

Fig. S10. (A) Schematics of the sensitivity of band-stop filters, (B) Crease pattern and (C) Miura-FSS. (D) Simulated  $S_{21}$  frequency response for a graded Miura-FSS.

**Table S1. Parameters  $\alpha_t$  and  $a_t$  of the top layer with  $b_t = 20$  mm for a kinematic compatibility with a bottom layer with  $a_b = 20$  mm,  $b_b = 20$  mm,  $\alpha_b = 45^\circ$ .**

| $\alpha_t$ | $52^\circ$ | $56^\circ$ | $60^\circ$ | $64^\circ$ | $70^\circ$ |
|------------|------------|------------|------------|------------|------------|
| $a_t$      | 22.97 mm   | 25.29 mm   | 28.28 mm   | 32.26 mm   | 41.35 mm   |

**Table S2. Paper properties: Rotational stiffness of the panels  $k_{bend}$  and hinges  $k_{fold}$**

| $k_{bend}$ (N*mm/rad/mm) | $R_{fold}^2$ | $k_{fold}$ (N*mm/rad/mm) | $R_{fold}^2$ |
|--------------------------|--------------|--------------------------|--------------|
| 0.02432                  | 0.9800       | 0.01211                  | 0.8734       |
| 0.02604                  | 0.9417       | 0.00602                  | 0.8926       |
| 0.02533                  | 0.9631       | 0.00622                  | 0.9212       |
| 0.02630                  | 0.9707       | 0.01263                  | 0.8959       |
| 0.02497                  | 0.9536       | 0.00478                  | 0.8713       |
| Average                  |              |                          |              |
| 0.025391                 | 0.96182      | 0.008353                 | 0.89088      |

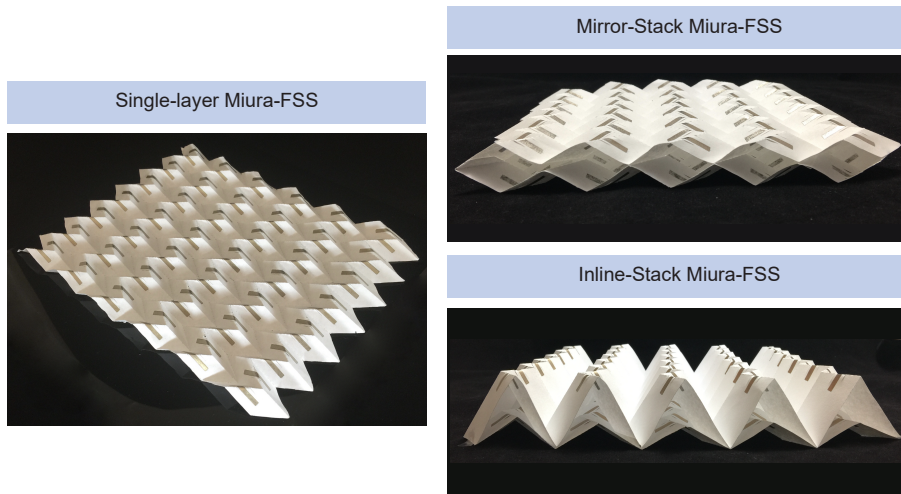

**Movie S1.** Miura-FSS Prototypes

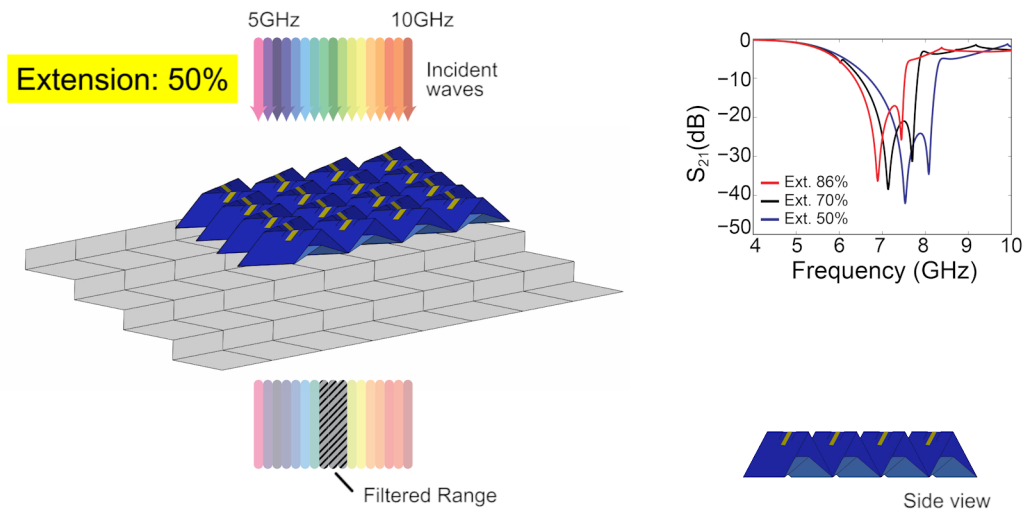

Movie S2. Schematics of the inline-stack Miura-FSS

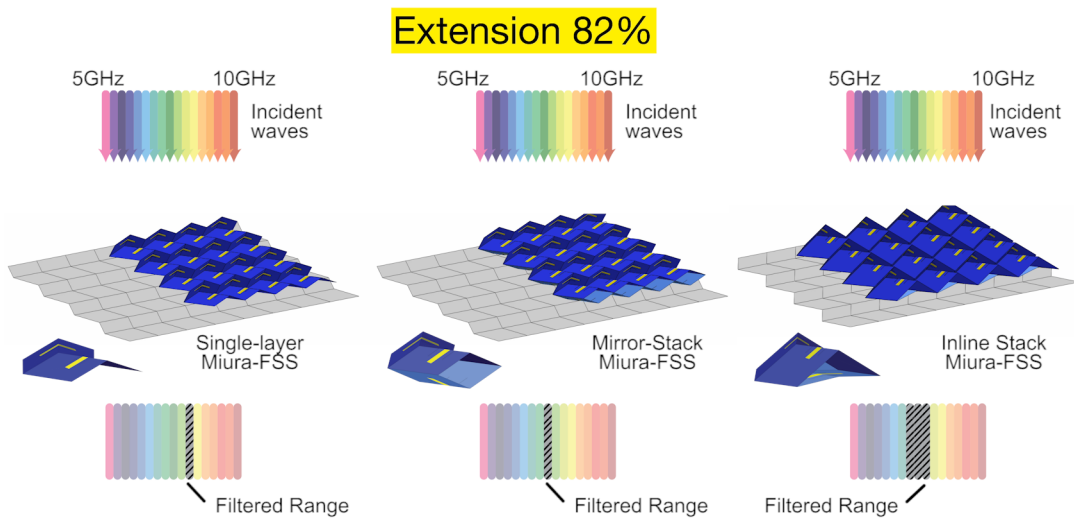

**Movie S3.** Schematic comparison of the response of the single-layer, mirror-stack, and inline-stack Miura-FSS

309 **Movie S1. Miura-FSS Prototypes**

310 **Movie S2. Schematics of the inline-stack Miura-FSS**

311 **Movie S3. Schematic comparison of the response of the single-layer, mirror-stack, and inline-stack Miura-FSS**

## 312 **References**

- 313 1. Wei ZY, Guo ZV, Dudte L, Liang HY, Mahadevan L (2013) Geometric mechanics of periodic pleated origami. *Physical*  
314 *review letters* 110(21):215501.
- 315 2. Schenk M, Guest SD (2013) Geometry of miura-folded metamaterials. *Proceedings of the National Academy of Sciences*  
316 110(9):3276–3281.
- 317 3. Klett Y, Middendorf P (2016) Kinematic analysis of congruent multilayer tessellations. *Journal of Mechanisms and*  
318 *Robotics* 8(3):034501.
- 319 4. Schenk M, Guest SD (2011) Origami folding: A structural engineering approach in *Origami 5: Fifth International Meeting*  
320 *of Origami Science, Mathematics, and Education*. (CRC Press, Boca Raton, FL), pp. 291–304.
- 321 5. Liu K, Paulino GH (2017) Nonlinear mechanics of non-rigid origami: an efficient computational approach. *Proc. R. Soc. A*  
322 473(2206):20170348.
- 323 6. Liu K, Paulino GH (2016) MERLIN: A MATLAB implementation to capture highly nonlinear behavior of non-rigid  
324 origami in *Proceedings of IASS Annual Symposia*. (International Association for Shell and Spatial Structures (IASS)), Vol.  
325 2016, pp. 1–10.
- 326 7. Liu K, Paulino GH (2018) Highly efficient nonlinear structural analysis of origami assemblages using the MERLIN2  
327 software in *Origami 7: Seventh International Meeting of Origami Science, Mathematics, and Education*. (Tarquin), Vol. 4,  
328 pp. 1167–1182.
- 329 8. Munk BA (2003) *Finite antenna arrays and FSS*. (John Wiley & Sons).
- 330 9. Lambea M, Gonzalez M, Encinar J, Zapata J (1995) Analysis of frequency selective surfaces with arbitrarily shaped  
331 apertures by finite element method and generalized scattering matrix. *Antennas and Propagation Society International*  
332 *Symposium, 1995. AP-S. Digest* 3:1644–1647.
- 333 10. Maci S, Cucini A (2006) FSS-based EBG surfaces. *Metamaterials: Physics and Engineering Explorations*.
- 334 11. Maci S, Caiazzo M, Cucini A, Casaletti M (2005) A pole-zero matching method for EBG surfaces composed of a dipole  
335 FSS printed on a grounded dielectric slab. *IEEE Transactions on Antennas and Propagation* 53(1):70–81.
- 336 12. Munk BA (2000) *Frequency selective surfaces: theory and design*. (Wiley Online Library) Vol. 29.
- 337 13. Xie R, Li J, Chen Y (2015) The graded origami structures in *ASME 2015 International Design Engineering Technical*  
338 *Conferences and Computers and Information in Engineering Conference*. (American Society of Mechanical Engineers), pp.  
339 V05BT08A026–V05BT08A026.
- 340 14. Pozar D, Metzler T (1993) Analysis of a reflectarray antenna using microstrip patches of variable size. *Electronics Letters*  
341 29(8):657–658.
- 342 15. Luo GQ, et al. (2007) Filtenna consisting of horn antenna and substrate integrated waveguide cavity fss. *IEEE transactions*  
343 *on antennas and propagation* 55(1):92–98.
- 344 16. Ferreira D, Cuiñas I, Caldeirinha RF, Fernandes TR (2017) 3-d mechanically tunable square slot fss. *IEEE Transactions*  
345 *on Antennas and Propagation* 65(1):242–250.
- 346 17. Klett Y, Middendorf P, Sobek W, Haase W, Heidingsfeld M (2017) Potential of origami-based shell elements as next-  
347 generation envelope components in *Advanced Intelligent Mechatronics (AIM), 2017 IEEE International Conference on*  
348 (IEEE), pp. 916–920.
- 349 18. Jang SD, Kang BW, Kim J (2012) Frequency selective surface based passive wireless sensor for structural health monitoring.  
350 *Smart Materials and Structures* 22(2):025002.
